# Supplementary material for: A single step wet chemical approach to bifunctional ultrathin (ZnO)62(Fe2O3)38 dendritic nanosheets
Source: Royal Society of Chemistry journal article supplement (doi:10.1039/d3ra04795d), 2023-01-01
Supplement: d3ra04795d1.pdf [file d3ra04795d1.pdf]

## Supporting Information

### A Single Step Wet Chemical Approach to Bifunctional Ultrathin (ZnO)<sub>62</sub>(Fe<sub>2</sub>O<sub>3</sub>)<sub>38</sub> Dendritic Nanosheets

Saba Latif,<sup>a</sup> Bilal Akram,<sup>\*b</sup> Chaudry Sajed Saraj,<sup>c,d</sup> Bilal Ahmad Khan,<sup>\*a</sup> Mudussar Ali<sup>e</sup> and Javeed Akhtar<sup>f</sup>

#### EXPERIMENTAL SECTION

**Synthesis of FZDNSs:** Initially, 259 mg ferrous chloride and 219 mg zinc acetate was dissolved into 50 mL deionized water through stirring. Then, another mixture was prepared by dissolving 210 mg urea and 378 mg sodium borohydride into 10 mL ethanol. After that, both the solutions were mixed under stirring for half an hour and then transferred into a 100 ml capacity sealed pressure tube and heated at oil bath at 100 °C for 12 hours. The formed products were then harvested through centrifugation, washed repeatedly with deionized water and ethanol, and then dried at 80 °C for 20 hours. Finally, the obtained products were annealed at 600 °C for 12 h under air atmosphere.

**Synthesis of ZnO:** 50 mL of 219 mg zinc acetate was dissolved in deionized water through continuous stirring. In another beaker 10 mL ethanolic solution of 210 mg urea and 378 mg sodium borohydride was prepared. Subsequently both the solutions were mixed, and the obtained mixture was transferred into a 100 ml capacity sealed pressure tube and heated at oil bath at 100 °C for 12 hours. The formed products were then harvested through centrifugation, washed repeatedly with deionized water and ethanol, and then dried at 80 °C for 20 hours. Finally, the obtained products were annealed at 600 °C for 12 h under air atmosphere.

**Synthesis of Fe<sub>2</sub>O<sub>3</sub>:** 50 mL of 259 mg ferrous chloride was dissolved in deionized water through continuous stirring. In another beaker 10 mL ethanolic solution of 210 mg urea and 378 mg sodium borohydride was prepared. Subsequently both the solutions were mixed, and the obtained mixture was transferred into a 100 ml capacity sealed pressure tube and heated at oil bath at 100 °C for 12 hours. The formed products were then harvested through centrifugation, washed repeatedly with

deionized water and ethanol, and then dried at 80 °C for 20 hours. Finally, the obtained products were annealed at 600 °C for 12 h under air atmosphere.

### **Characterization of prepared test analytes**

Transmission electron microscopy (TEM) (Hitachi, H-800; operated at 200kV), scanning electron microscopy (SEM) and X-ray diffraction (Rigaku, Smartlab; operated at 40kV and 200mA, Cu K $\alpha$  source) were employed to get structural characterization of synthesized test analytes. Energy Dispersive X-ray spectroscopy coupled with electron microscopy (EDX) was used to determine the elemental composition of the synthesized test analytes. The precise elemental composition and hence the precise molecular formula was estimated using inductively coupled optical emission spectroscopy (ICP-OES). The surface functional groups and successful preparation of target material was determined by applying Fourier transform infrared (FTIR) analysis using FTIR spectrometer (FTIR-2000, Bruker). The absorption properties were recorded on a UV–Vis spectrophotometer (Shimadzu-1601). Thermogravimetric analysis (TGA) was performed with Mettler Toledo TGA/SDTA851e at a heating rate of 10 °C min<sup>-1</sup> from room temperature to 700 °C under air flow.

### **Photoreduction performance of FZDNSs**

Photocatalytic performance of newly designed FZDNSs was assessed using one of the most common reaction, para-nitrophenol conversion to para-aminophenol. Photoreduction experiments were conducted using 50mL of known concentration of p-nitrophenol (1 mmol) with 50mg of nano catalyst (1mg catalyst/mL of para-nitrophenol solution). The reaction was initiated by adding 0.05 mole of NaBH<sub>4</sub> as reducing agent. The obtained reaction mixture was stirred in dark for 20 minutes to get adsorption and desorption equilibrium. After dark treatment catalyst containing reaction mixture was subject to stirring under light illumination. The progress of photoreduction reaction was monitored using UV-vis spectrophotometer at regular time intervals. While analysing the reaction progress syringe was used to get required volume of reaction solution to minimize catalyst injection. The reusability and steadiness of photocatalyst was assessed by removing and reusing the catalyst from the reaction mixture after reaction completion. Catalyst was harvested through centrifugation, washed several times with water and ethanol and oven dried prior to reuse.

### **Electrochemical Measurements**

Electrocatalyst ink of various test analytes were obtained by first ultrasonically dispersing 5 mg of test analytes into 0.5ml of isopropyl alcohol (IPA) and 0.5ml deionized water solution followed by the addition of 50  $\mu$ l of 0.5M Nafion solution.

10  $\mu\text{l}$  of as prepared catalyst ink was deposited on a Carbon cloth electrode ( $0.6\text{cm}^2$  area) to get the working electrode which was dried in air at room temperature prior to use.

Electrochemical measurements were performed on BioLogic VMP3 multichannel workstation with a three-electrode system, where a Pt wire, a catalyst loaded carbon cloth electrode, and a saturated calomel electrode (SCE) were used as counter, working and reference electrodes, respectively. The electrolytes employed during electrochemical measurements is aqueous 1M KOH solution. LSV curves were obtained by sweeping voltage in the range of -0.2 to -1.6 V vs SCE electrode with the scan rate of  $10\text{ mVs}^{-1}$ . Expression  $E_{RHE} = E_{SCE} + E_{SCE}^0 + 0.0592 * pH$ , where  $E_{SCE}^0 = 0.242\text{ V}$ , was used to translate V vs SCE to V vs reverse hydrogen electrode (RHE). WE were pre-stabilized in the electrolyte solution using several scans of cyclic voltammetry at  $40\text{mV/s}$  before performing linear sweep voltammetry measurements. Electrochemical impedance spectra (EIS) were recorded with the biasing of working electrode at -1.4V (HER) and superimposing a small alternating voltage of 10 mV over the frequency range of 0.01Hz to 1 MHz. The CV curves were further measured in the non-Faradaic region of potential from 0.83 V to 0.91 V (vs RHE) with different scan rates (from  $10\text{ mVs}^{-1}$  to  $100\text{ mVs}^{-1}$ ) to estimate the double layer capacitance (Cdl).

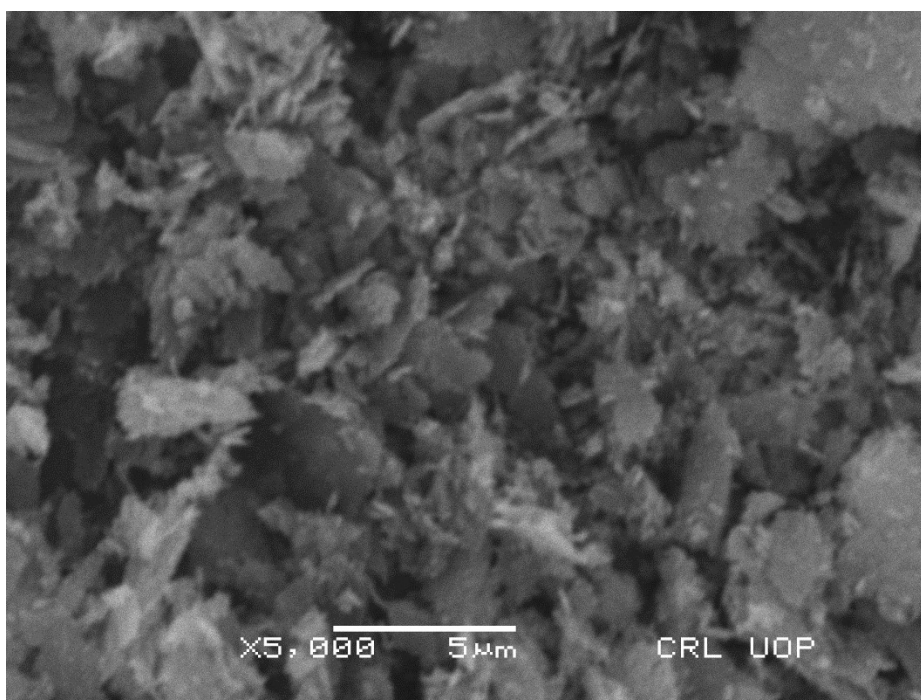

Figure S1. SEM image of FZDNSs.

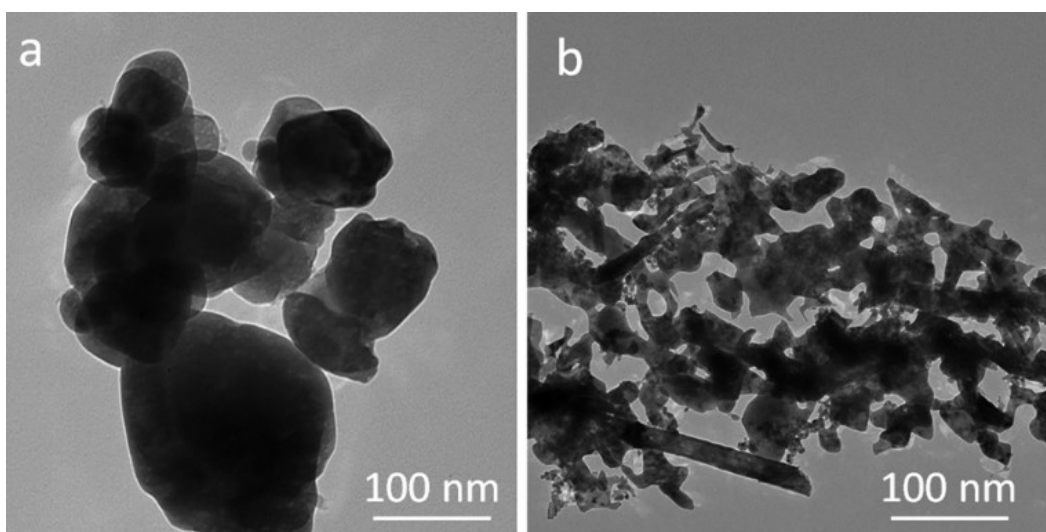

Figure S2. TEM images of a) pure ZnO and b) pure Fe<sub>2</sub>O<sub>3</sub>

Table S1. ICP-OES analysis results of Zn and Fe in FZDNSs.

|    | sample | FZDNSs |
|----|--------|--------|
| Zn | 34.64  | wt%    |
| Fe | 48.69  | wt%    |

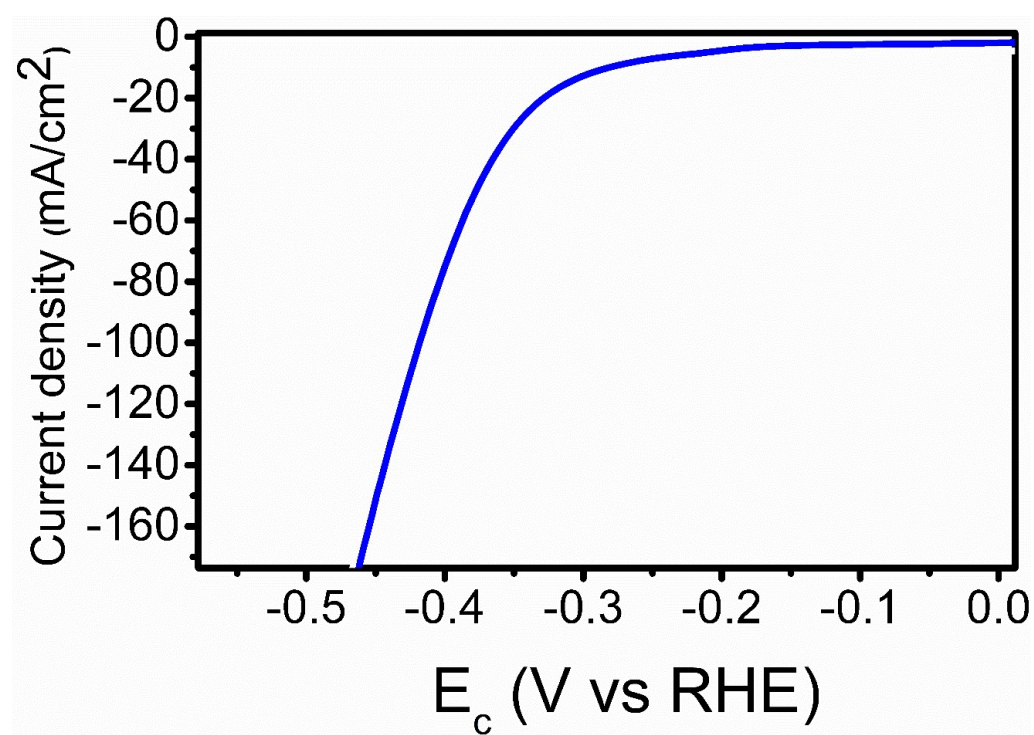

Figure S3. LSV curve of FZDNSs after CA test.

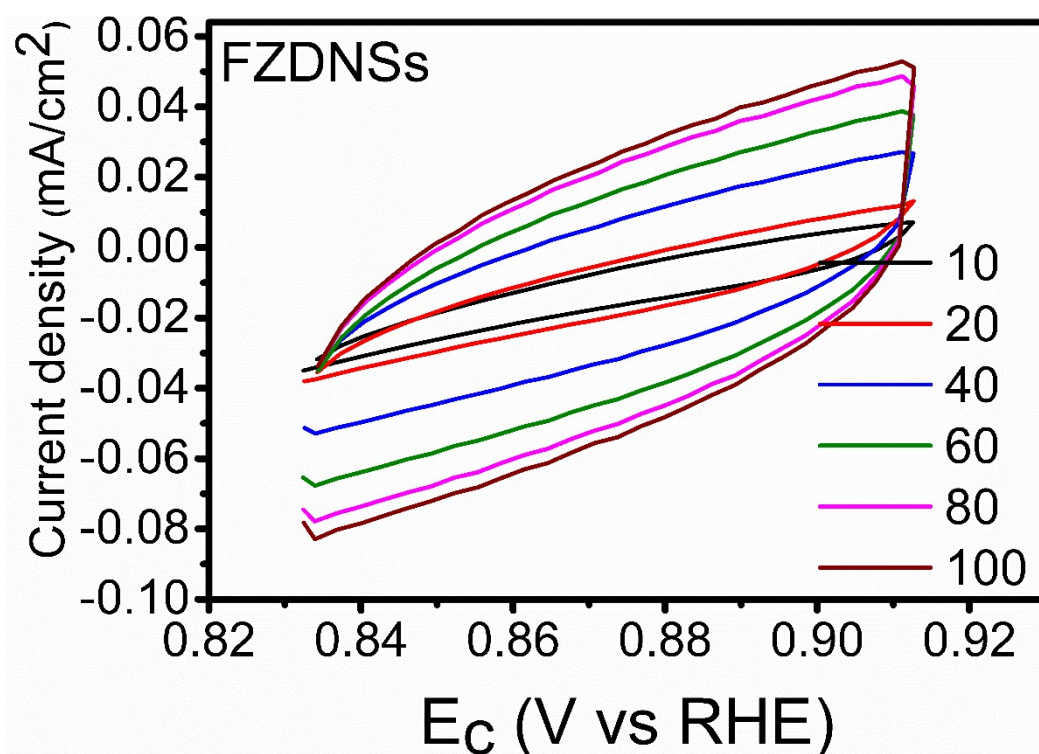

Figure S4. Cdi curves of FZDNSs.

Table S2. Comparative literature data for the reduction of 4-NP using different catalysts.

| Sr No | Photocatalyst                                                       | Concentration mg/L | Loading mg | Light source  | Time (min) | Efficiency % | Reference |
|-------|---------------------------------------------------------------------|--------------------|------------|---------------|------------|--------------|-----------|
| 1     | Fe <sub>2</sub> O <sub>3</sub> /RGO                                 | 20                 | 50         | Visible light | 120        | 78           | 01        |
| 2     | Ag/In <sub>2</sub> S <sub>3</sub> /ZnO                              | 10                 | 50         | Visible light | 50         | 55           | 02        |
| 3     | In <sub>2</sub> S <sub>3</sub> 3%GR                                 | 10                 | 10         | Visible light | 120        | 80           | 03        |
| 4     | In <sub>2</sub> S <sub>3</sub> -3%CNT                               | 10                 | 40         | Visible light | 60         | 97           | 04        |
| 5     | 60%In <sub>2</sub> S <sub>3</sub> /α-Fe <sub>2</sub> O <sub>3</sub> | 10                 | 40         | Visible light | 100        | 95           | 05        |
| 6     | FZDNSs                                                              | 10                 | 50         | Visible light | 50         | 96           | This work |

Table S3. Performance comparison of FZDNSs with previously reported materials towards HER application.

| Sr. No | Electrocatalyst                  | Electrolyte HER | η value at 10 mA cm <sup>-2</sup> | Tafel slope mV/dec <sup>-2</sup> | Reference |
|--------|----------------------------------|-----------------|-----------------------------------|----------------------------------|-----------|
| 1      | P-Co <sub>3</sub> O <sub>4</sub> | 1 M KOH         | 120 mV                            | 52.0                             | 6         |
| 2      | Fe-P/Ti                          | 1 M KOH         | 95 mV                             | -                                | 7         |
| 3      | Fe-P                             | 1 M KOH         | 194 mV                            | 75.0                             | 8         |
| 4      | Fe CoO-NF                        | 1 M KOH         | 205 mV                            | 118.0                            | 9         |
| 5      | Ni CoFeP/C                       | 1 M KOH         | 149 mV                            | 89.0                             | 10        |

|    |                                                       |         |        |       |           |
|----|-------------------------------------------------------|---------|--------|-------|-----------|
| 6  | Ni-Fe <sub>2</sub> O <sub>3</sub>                     | 1 M KOH | 310 mV |       | 11        |
| 7  | Ni-FeP/C                                              | 1 M KOH | 95 mV  | 72    | 12        |
| 8  | N-FeP                                                 | 1 M KOH | 226 mV | 84.8  | 13        |
| 9  | NiCoFeO                                               | 1 M KOH | 131 mV | 56    | 14        |
| 10 | Mn-FeO                                                | 1 M KOH | 173 mV | 95    | 15        |
| 11 | 13 Ni-Fe/NF                                           | 1 M KOH | 142 Mv | 133.3 | 16        |
| 12 | Co 0.75 Fe 0.25-NC                                    | 1 M KOH | 202 mV | 67.96 | 17        |
| 13 | Co 0.59 Fe 0.41 P                                     | 1 M KOH | 92 mV  | 72    | 18        |
| 14 | Fe <sub>3</sub> +Ni@NCF                               | 1 M KOH | 219 mV | 109.9 | 19        |
| 15 | P-doped Fe <sub>2</sub> O <sub>3</sub> /ZnO nanotubes | 1 M KOH | 139 mV | 104   | 20        |
| 16 | N-doped Fe <sub>2</sub> O <sub>3</sub> /ZnO nanotubes | 1 M KOH | 312 mV | 315   | 20        |
| 17 | ZnO NPs                                               | 1 M KOH | 647 mV | 91    | This work |
| 18 | Fe <sub>2</sub> O <sub>3</sub> NPs                    | 1 M KOH | 281 mV | 79    | This work |
| 19 | FZDNSs                                                | 1 M KOH | 182 mV | 64    | This work |

## References

1. B.S. Mohan, K. Ravi, R.B. Anjaneyulu, G.S. Sree, K. Basavaiah, *Phys. Condens. Matter*, 2019, 553 190–194.
2. J.W. Wei, S.M. Wei, N. Chang, H.T. Wang, J.M. Zhang, *Nanotechnology*, 2021, 32, 10, 105706.
3. M.Q. Yang, B. Weng, Y.J. Xu, *Langmuir*, 2013, 29, 33, 10549–10558.
4. M.Q. Yang, B. Weng, Y.J. Xu, *J. Mater. Chem. A*, 2014, 2, 6, 1710–1720.
5. L. Fang, R. Jiang, Y. Zhang, R. M. Munthali, X. Huang, X. Wu, Z. Liu, *J. Solid Stat. Chem.*, 2021, 303, 122461.
6. Z. Xiao, Y. Wang, Y.-C. Huang, Z. Wei, C.-L. Dong, J. Ma, S. Shen, Y. Li and S. Wang, *Energy Environ. Sci.*, 2017, 10, 2563–2569.
7. X. Zhao, Z. Zhang, X. Cao, J. Hu, X. Wu, A. Y. R. Ng, G. P. Lu and Z. Chen, *Appl. Catal. B Environ.*, 2020, 260, 118156.
8. C. Y. Son, I. H. Kwak, Y. R. Lim and J. Park, *Chem. Commun.*, 2016, 52, 2819–2822.
9. H. A. Bandal, A. R. Jadhav, A. H. Tamboli and H. Kim, *Electrochim. Acta*, 2017, 249, 253–262.
10. X. Wei, Y. Zhang, H. He, L. Peng, S. Xiao, S. Yao and P. Xiao, *Chem. Commun.*, 2019, 55, 10896–10899.
11. L. Zeng, K. Zhou, L. Yang, G. Du, L. Liu and W. Zhou, *ACS Appl. Energy Mater.*, 2018, 1, 6279–6287.
12. S. Xu, H. Zhao, T. Li, J. Liang, S. Lu, G. Chen, S. Gao, A. M. Asiri, Q. Wu and X. Sun, *J. Mater. Chem. A*, 2020, 8, 19729–19745.

13. J. Huang, J. Han, T. Wu, K. Feng, T. Yao, X. Wang, S. Liu, J. Zhong, Z. Zhang, Y. Zhang and B. Song, *ACS Energy Lett.*, 2019, 3002–3010.
14. Z. Ge, B. Fu, J. Zhao, X. Li, B. Ma and Y. Chen, *J. Mater. Sci.*, 2020, 55, 14081–14104.
15. M. Wang, Y. Tuo, X. Li, Q. Hua, F. Du and L. Jiang, *ACS Sustain. Chem. Eng.*, 2019, 7, 12419–12427.
16. Z. Zhang, Y. Wu and D. Zhang, *Int. J. Hydrogen Energy*, 2022, 47, 1425–1434.
17. X. Feng, X. Bo and L. Guo, *J. Power Sources*, 2018, 389, 249–259.
18. X. Wen and J. Guan, *Appl. Mater. Today*, 2019, 16, 146–168.
19. Z. Zhang, L. Cong, Z. Yu, L. Qu and W. Huang, *Mater. Today Energy*, 2020, 16, 100387
20. P. M. Ganje, H. A. Bandal and K. Hern, *Sustainable Energy & Fuels*, 2022, 6, 5579-5590.
